# Supplementary material for: Importance of ice elasticity in simulating tide-induced grounding line variations along prograde bed slopes
Source: Copernicus journal article supplement (doi:10.5194/tc-19-1995-2025), 2025-06-03
Supplement: Supplementary file 1 [file tc-19-1995-2025-supplement.pdf]

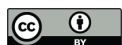

## *Supplement of*

# **Importance of ice elasticity in simulating tide-induced grounding line variations along prograde bed slopes**

**Natalya Ross et al.**

*Correspondence to:* Natalya Ross (nmaslenn@cougarnet.uh.edu)

The copyright of individual parts of the supplement might differ from the article licence.

### S.1. Reference measurements

Grounding zone measurements were performed using pairs of DInSAR interferograms at high and low tide; bedrock slope and ice thickness were calculated using Bed Machine Antarctica, and ice flow speed was determined using MEaSUREs InSAR-based ice velocity map of Antarctica (Rignot et al., 2017). The summary of the measurements, performed along ~20 km-long flow lines (see Figure 1), are provided in Table S1.

**Table S1.** Minimum, maximum, and average values of the grounding zone width, ice thicknesses, bed slopes, and ice flow speed of TOT, MU, and REN glaciers calculated along the profiles of the corresponding glaciers.

| Glacier characteristics  |      | TOT             | MU            | REN           | Data source                                                                             |
|--------------------------|------|-----------------|---------------|---------------|-----------------------------------------------------------------------------------------|
| Grounding zone, km       | Min  | $1.2 \pm 0.4$   | $0.6 \pm 0.4$ | $1.3 \pm 0.4$ | Pairs of DInSAR interferograms                                                          |
|                          | Mean | $4.1 \pm 0.4$   | $2.1 \pm 0.4$ | $2.3 \pm 0.4$ |                                                                                         |
|                          | Max  | $14.9 \pm 0.4$  | $5.1 \pm 0.4$ | $3.4 \pm 0.4$ |                                                                                         |
| Ice thickness, km        | Min  | $1.9 \pm 0.2$   | $2.0 \pm 0.2$ | $0.9 \pm 0.3$ | BedMachine2<br>(Morlighem et al., 2017)                                                 |
|                          | Mean | $2.2 \pm 0.1$   | $2.2 \pm 0.1$ | $1.1 \pm 0.2$ |                                                                                         |
|                          | Max  | $2.4 \pm 0.2$   | $2.4 \pm 0.1$ | $1.2 \pm 0.1$ |                                                                                         |
| Bed slope, %             | Min  | $0.01 \pm 0.01$ | $0.2 \pm 0.2$ | $0.3 \pm 0.2$ | BedMachine2<br>(Morlighem et al., 2017)                                                 |
|                          | Mean | $1.2 \pm 0.1$   | $2.2 \pm 0.2$ | $1.4 \pm 0.2$ |                                                                                         |
|                          | Max  | $4.0 \pm 0.2$   | $5.9 \pm 0.3$ | $3.5 \pm 0.3$ |                                                                                         |
| Ice flow speed, m / year | Min  | $492 \pm 113$   | $171 \pm 41$  | $117 \pm 51$  | InSAR-based ice velocity data<br>provided by MEaSUREs program<br>(Rignot et al., 2017). |
|                          | Mean | $647 \pm 65$    | $335 \pm 20$  | $172 \pm 24$  |                                                                                         |
|                          | Max  | $754 \pm 49$    | $381 \pm 18$  | $192 \pm 12$  |                                                                                         |

## S.2. Tidal and IBE effects

Tidal heights during satellite passages and Inverse barometer effect (IBE) correction values for each interferogram are provided in Table S2. The tidal heights were estimated using the Circum-Antarctic Tidal Simulation (CATS2008) (Padman et al., 2002), while the IBE correction values were obtained using ERA-5 (Hersbach et al., 2020).

**Table S2.** Differences in tidal levels for the pairs of DInSAR interferograms after accounting for the IBE correction.

The acquisition dates of the Primary 1 (P<sub>1</sub>), Secondary 1 (S<sub>1</sub>), Primary 2 (P<sub>2</sub>), and Secondary 2 (S<sub>2</sub>) images are shown in YYYYMMDD format. The values are provided in meters. The differential tidal difference ( $\Delta$ Tide) shows the tidal variation within one interferogram and is calculated as the difference between the tidal levels of the image pairs:  $\Delta Tide = (Tide(P_1) - Tide(S_1)) - (Tide(P_2) - Tide(S_2))$ . The differential IBE correction was calculated similarly. H correspond to the maximum tidal height after applying the IBE correction ( $H = \text{Max tide} + \Delta \text{IBE}$ ).  $\Delta H$  shows the difference in corrected maximum tidal levels between the pairs of interferograms for each glacier.

| Glacier | P <sub>1</sub> | S <sub>1</sub> | P <sub>2</sub> | S <sub>2</sub> | Tide P <sub>1</sub> | Tide S <sub>1</sub> | Tide P <sub>2</sub> | Tide S <sub>2</sub> | $\Delta$ Tide | Max tide | IBE P <sub>1</sub> | IBE S <sub>1</sub> | IBE P <sub>2</sub> | IBE S <sub>2</sub> | $\Delta$ IBE | $\Delta$ Tide + $\Delta$ IBE | H    | $\Delta$ H |
|---------|----------------|----------------|----------------|----------------|---------------------|---------------------|---------------------|---------------------|---------------|----------|--------------------|--------------------|--------------------|--------------------|--------------|------------------------------|------|------------|
| TOT     | 20201015       | 20201016       | 20201116       | 20201117       | 0.45                | 0.23                | -0.53               | -0.61               | 0.14          | 0.45     | 0.25               | 0.11               | 0.44               | 0.38               | 0.08         | 0.22                         | 0.53 | 1.03       |
| TOT     | 20201116       | 20201117       | 20201202       | 20201203       | -0.53               | -0.61               | -0.48               | -0.55               | 0.01          | -0.48    | 0.44               | 0.38               | 0.27               | 0.19               | -0.02        | -0.01                        | -0.5 |            |
| REN     | 20201010       | 20201011       | 20201111       | 20201112       | -0.09               | -0.14               | 0.83                | 0.96                | 0.18          | 0.96     | 0.43               | 0.15               | 0.38               | 0.28               | 0.18         | 0.36                         | 1.14 | 1.08       |
| REN     | 20201010       | 20201011       | 20201213       | 20201214       | -0.09               | -0.14               | -0.16               | -0.02               | 0.19          | -0.02    | 0.43               | 0.15               | 0.41               | 0.21               | 0.08         | 0.27                         | 0.06 |            |
| MU      | 20210503       | 20210504       | 20210706       | 20210707       | 0.76                | 0.48                | -0.21               | -0.13               | 0.36          | 0.76     | 0.21               | 0.16               | 0.28               | 0.32               | 0.09         | 0.45                         | 0.85 | 0.95       |
| MU      | 20210604       | 20210605       | 20210706       | 20210707       | -0.15               | -0.24               | -0.21               | -0.13               | 0.17          | -0.13    | 0.17               | 0.18               | 0.28               | 0.32               | 0.03         | 0.2                          | -0.1 |            |

### S.3. Model notation

The notation used in this paper is listed in Table S3.

**Table S3.** Models' principal notation.

| Symbol                             | Quantity                                                              | Field type           | Units                                             |
|------------------------------------|-----------------------------------------------------------------------|----------------------|---------------------------------------------------|
| <b>Geometry-related quantities</b> |                                                                       |                      |                                                   |
| $(X, Y)$                           | laboratory coordinate system                                          | 2D coordinate system | $(m, m)$                                          |
| $\mathbf{x} = (x, y)$              | spatial point $\mathbf{x}$ with coordinates $x$ and $y$               | Point in 2D space    | $(m, m)$                                          |
| $\Omega$                           | 2D glacier domain                                                     | 2D spatial domain    | $(m, m)$                                          |
| $\partial\Omega$                   | boundary of the glacier domain                                        | Geometric boundary   | $m$                                               |
| $\Gamma_D$                         | inflow boundary                                                       | Geometric boundary   | $m$                                               |
| $\Gamma_N$                         | outflow boundary                                                      | Geometric boundary   | $m$                                               |
| $\Gamma_a$                         | ice–air surface                                                       | Geometric boundary   | $m$                                               |
| $\Gamma_b$                         | ice–bedrock surface                                                   | Geometric boundary   | $m$                                               |
| $\Gamma_w$                         | ice–water surface                                                     | Geometric boundary   | $m$                                               |
| $\Gamma_s$                         | lower glacier boundary                                                | Geometric boundary   | $m$                                               |
| $h(\mathbf{x}, t)$                 | surface elevation of the ice shelf                                    | Scalar               | $m$                                               |
| $s(\mathbf{x}, t)$                 | lower boundary of the ice shelf                                       | Scalar               | $m$                                               |
| $\alpha$                           | bedrock slope                                                         | Scalar               | %                                                 |
| $b(\mathbf{x})$                    | bedrock slope function                                                | Scalar               | $m$                                               |
| $A$                                | bedrock inclination parameter                                         | Scalar               | $m$                                               |
| $L$                                | glacier length                                                        | Scalar               | $m$                                               |
| $H(t)$                             | glacier thickness                                                     | Scalar               | $m$                                               |
| $l(t)$                             | sea level                                                             | Scalar               | $m$                                               |
| $\hat{\mathbf{n}}(\mathbf{x})$     | unit outward normal vector at point $\mathbf{x}$ of a domain boundary | Vector               | –                                                 |
| <b>Materials properties</b>        |                                                                       |                      |                                                   |
| $\rho_i$                           | ice density                                                           | Scalar               | $kg \cdot m^{-3}$                                 |
| $\rho_w$                           | water density                                                         | Scalar               | $kg \cdot m^{-3}$                                 |
| $\phi$                             | friction                                                              | Scalar               | $Pa \cdot s \cdot m^{-1}$                         |
| $C$                                | friction coefficient                                                  | Scalar               | $Pa \cdot \left(\frac{s}{m}\right)^{\frac{1}{n}}$ |
| $\eta$                             | ice viscosity                                                         | Scalar               | $Pa \cdot s$                                      |
| $G$                                | shear modulus                                                         | Scalar               | $Pa$                                              |
| $\lambda$                          | relaxation time                                                       | Scalar               | $s$                                               |
| $n$                                | stress exponent (from the Glen's flow law)                            | Scalar               | –                                                 |
| $A$                                | ice softness                                                          | Scalar               | $Pa^{-n} \cdot s^{-1}$                            |
| <b>Physical quantities</b>         |                                                                       |                      |                                                   |
| $t$                                | time                                                                  | Scalar               | $s$                                               |
| $p$                                | ice pressure                                                          | Scalar               | $Pa$                                              |
| $p_w$                              | water pressure at the ice–water interface                             | Scalar               | $Pa$                                              |
| $p_w^0$                            | hydrostatic water pressure                                            | Scalar               | $Pa$                                              |
| $v_0$                              | inflow speed on $\Gamma_D$                                            | Scalar               | $m \cdot s^{-1}$                                  |
| $\mathbf{v}$                       | ice flow velocity                                                     | Vector               | $m \cdot s^{-1}$                                  |

|                                       |                                                                                                         |          |                    |
|---------------------------------------|---------------------------------------------------------------------------------------------------------|----------|--------------------|
| $\mathbf{g}$                          | acceleration due to gravity                                                                             | Vector   | $m \cdot s^{-2}$   |
| $\mathbf{D}$                          | strain rate tensor                                                                                      | Tensor   | $s^{-1}$           |
| $\mathbf{T}$                          | Cauchy stress tensor                                                                                    | Tensor   | $Pa$               |
| $\boldsymbol{\tau}$                   | deviatoric stress tensor                                                                                | Tensor   | $Pa$               |
| <b>Mathematical operators</b>         |                                                                                                         |          |                    |
| $\mathbb{I}$                          | identity tensor                                                                                         | Tensor   | —                  |
| $\mathbb{P}$                          | orthogonal projection onto the boundary                                                                 | Tensor   | —                  |
| $\nabla$                              | spatial gradient operator                                                                               | Operator | $m^{-1}$           |
| $\nabla \cdot$                        | spatial divergence operator                                                                             | Operator | $m^{-1}$           |
| $\cdot$                               | inner (dot) product                                                                                     | Operator | —                  |
| $\otimes$                             | tensor product                                                                                          | Operator | —                  |
| $\overset{\nabla}{\boldsymbol{\tau}}$ | upper-convected time derivative of some tensor field (in this case, of the tensor $\boldsymbol{\tau}$ ) | Operator | $Pa \cdot s^{-1}$  |
| <b>Model numerical parameters</b>     |                                                                                                         |          |                    |
| $\delta \ll 1$                        | Glen's flow law numerical parameter, used to prevent model numerical instabilities                      | Scalar   | $s^{-2}$           |
| $\varepsilon \ll 1$                   | Numerical parameter in the friction expression, used to prevent numerical instabilities                 | Scalar   | $m^2 \cdot s^{-2}$ |

#### S.4. Comparison of viscous and viscoelastic models

Short comparison of the main aspect of the models, including the computational time to run each model for different input parameters is provided in Table S4.

**Table S4.** Comparison of the main properties of the viscous and viscoelastic models.

| Characteristics                                         |                                                   | Viscous model                                                                      | Viscoelastic model                                                                                                                                   | Similarity |
|---------------------------------------------------------|---------------------------------------------------|------------------------------------------------------------------------------------|------------------------------------------------------------------------------------------------------------------------------------------------------|------------|
| <b>Material properties of glacier flow</b>              |                                                   |                                                                                    |                                                                                                                                                      |            |
| Compressibility                                         |                                                   | Incompressible                                                                     | Incompressible                                                                                                                                       | Same       |
| Rheological behavior                                    |                                                   | Non-Newtonian                                                                      | Non-Newtonian                                                                                                                                        | Same       |
| Material behavior                                       |                                                   | Viscous                                                                            | Viscoelastic                                                                                                                                         | Different  |
| <b>Physical formulation of the models</b>               |                                                   |                                                                                    |                                                                                                                                                      |            |
| Glacier domain                                          |                                                   | Equations (1) – (5)                                                                | Equations (1) – (5)                                                                                                                                  | Same       |
| Boundary conditions                                     |                                                   | Equations (22) – (27)                                                              | Equations (22) – (27)                                                                                                                                | Same       |
| Governing equation                                      | Conservation of mass in case of incompressibility | Equation (6)                                                                       | Equation (6)                                                                                                                                         | Same       |
|                                                         | Conservation of momentum (Stokes equation)        | Equation (7)                                                                       | Equation (7)                                                                                                                                         | Same       |
|                                                         | Constitutive law (Hooke's law)                    | Both Hooke's law (8) and ice viscosity (10) are defined via strain rate tensor (9) | Both Hooke's law (11) and ice viscosity (13) are defined via deviatoric stress tensor $\tau$ (12), which, in turn, depends on strain rate tensor (9) | Different  |
| <b>Implementation of the models</b>                     |                                                   |                                                                                    |                                                                                                                                                      |            |
| Penalized problem solved by the model on each time step |                                                   | Equation (3.21) in (Stubblefield et al., 2021)                                     | Equation (40)                                                                                                                                        | Different  |
| Computation time* (HH:MM:SS)                            | Glacier thickness = 1.0 km                        | 01:07:07                                                                           | 02:57:48                                                                                                                                             | Different  |
|                                                         | Glacier thickness = 1.5 km                        | 01:34:29                                                                           | 04:21:10                                                                                                                                             | Different  |
|                                                         | Glacier thickness = 2.0 km                        | 01:59:54                                                                           | 06:07:50                                                                                                                                             | Different  |
|                                                         | Glacier thickness = 2.5 km                        | 02:41:39                                                                           | 07:30:08                                                                                                                                             | Different  |

\* For 2.3 GHz 8-Core Intel Core i9 processor. Model input parameters: Domain length = 20 km; Bed slope = 1.0 %; Inflow speed = 100 m/year; Mesh size = 250 m and 50 m on upper and lower domain boundaries, respectively. The time is provided the HH:MM:SS format, where H shows the number of hours, M shows the number of minutes, and S is the number of seconds

### S.5. Mesh sensitivity analysis

Models' sensitivity to mesh size was analyzed using 200 grounding zone width values (Figure S1), obtained for different mesh sizes of the lower domain surface (from 10 m to 250 m with 10 m step) and constant mesh size of 250 m at the upper domain surface. Through multiple models runs, we determined that reducing the mesh size on the upper boundary does not enhance the results but significantly increases computational time. For both models, the tests were performed for four sets of input parameters: 1) bed slope of 0.5 %, glacier thickness of 1 km, and ice inflow speed of 100 m/year (green dots in Figure S1); 2) bed slope of 5 %, glacier thickness of 1 km, and ice inflow speed of 100 m/year (red dots in Figure S1); 3) bed slope of 5 %, glacier thickness of 2.5 km, and ice inflow speed of 100 m/year (blue dots in Figure S1); 4) bed slope of 5 %, glacier thickness of 1 km, and ice inflow speed of 800 m/year (black dots in Figure S1). The viscoelastic model is more affected by mesh size than the viscous model. For example, grounding zone width values for glaciers with thicknesses of 2.5 km and 1 km, both with an inflow speed of 100 m/year, converge to approximately 1.45 km for a mesh size of 250 m. However, at a mesh size of 10 m, these values were 0.96 km and 0.84 km, respectively (Figure S1 (d)). Comparing the dependences for the same slope of 5% for both models, we conclude that for glaciers with the same thickness, lower ice flow speed is more sensitive to the mesh size (red and black dots in Figure S1 (c) and (d)).

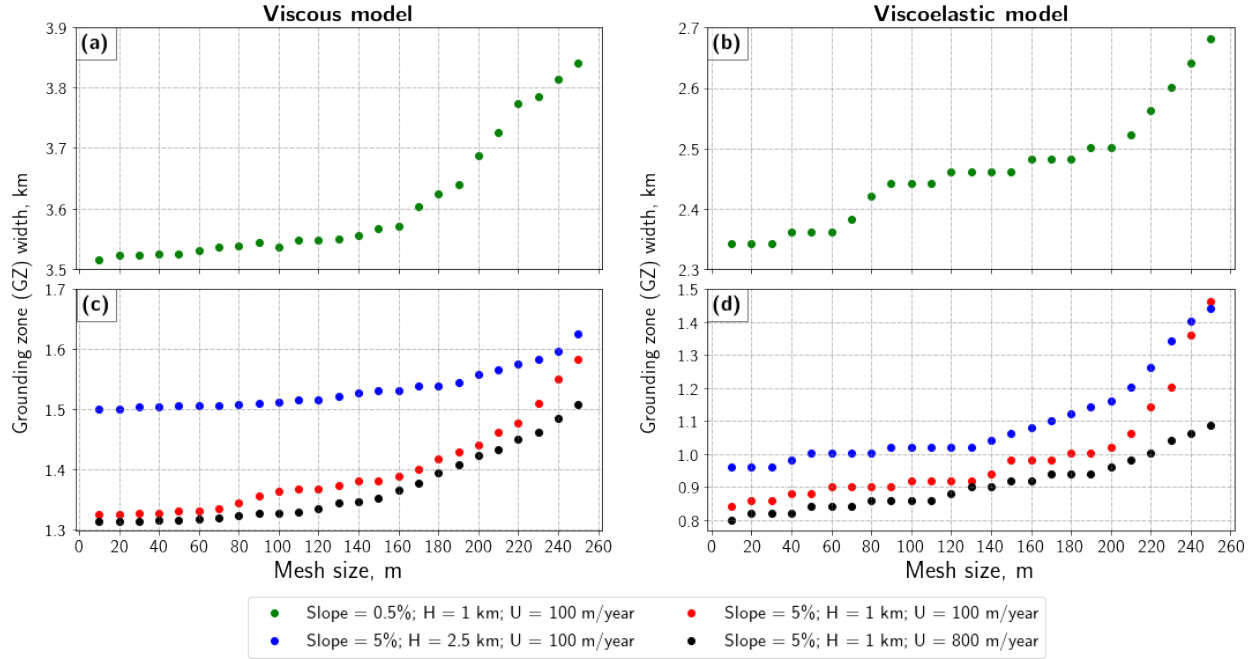

**Figure S1.** Models mesh sensitivity check. Plots (a) and (c) correspond to the viscous model, and plots marked (b) and (d) represent the viscoelastic model.

### S.6. DInSAR data-inferred parameters as model inputs

Fixing 50 m and 250 m as mesh sizes at the lower and upper domain boundaries, respectively, and keeping the constant glacier domain length of 20 km, each model was executed 192 times using all possible combinations of input parameters, listed in Figure S2.

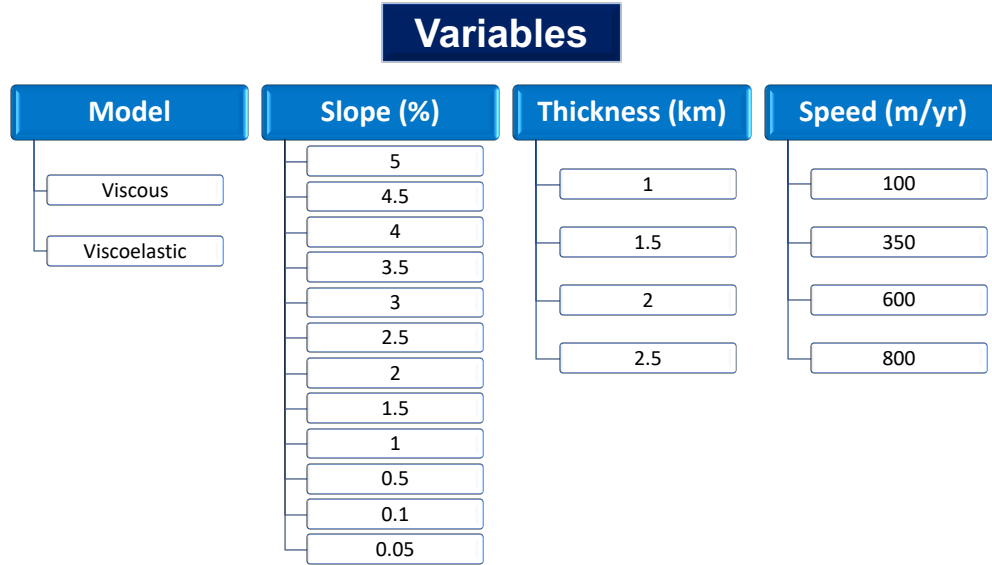

**Figure S2.** Schematic representation of the initial parameters. All possible combinations of these variables were examined in the paper.

### S.7. Reference relationship between bed slopes and grounding zones

The measured grounding zones correlate with bed slopes as an inverse power law, shown in Figure S3.

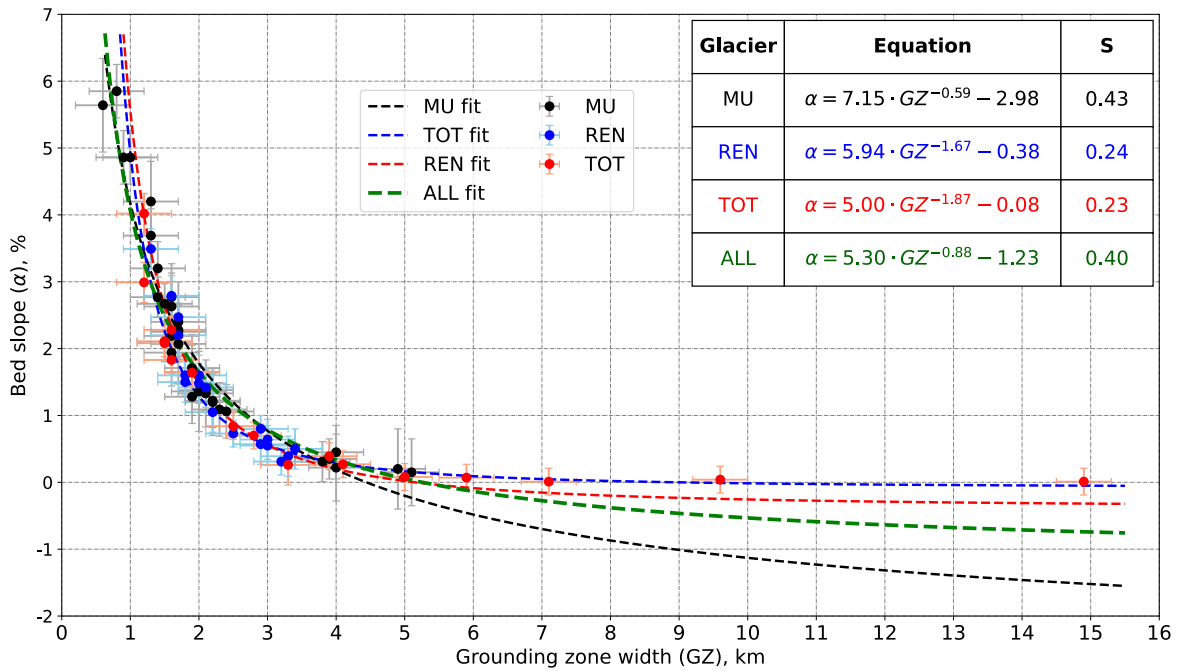

**Figure S3.** Correlation between DInSAR-derived grounding zones (GZ) and bedrock slopes ( $\alpha$ ). The measurements were approximated using an inverse power law function  $\alpha = a \cdot GZ^b + c$ , where  $b < 0$ . The fit quality was evaluated using standard error of regression (S) and is shown in the table in the top right corner alongside the corresponding approximating equations.



### S.8. Grounding zone evolution with glacier thickness

The dependence of grounding zone width ( $GZ$ ) on glacier thickness ( $H$ ) for each inflow speed and bed slope, approximated with a linear function  $GZ = a \cdot H + b$ , provides unique coefficients  $a$  and  $b$  for each model formulation, bed slope, and ice inflow speed. These  $a$  and  $b$  values are listed in Table S5.

**Table S5.** Equations of the approximating lines of all considered dependences of the grounding zone magnitude from the glacier thickness.

| Slope, % | Inflow speed, m/year | Approximating line equation, viscous model | R <sup>2</sup> value, viscous model | Approximating line equation, viscoelastic model | R <sup>2</sup> value, viscoelastic model |
|----------|----------------------|--------------------------------------------|-------------------------------------|-------------------------------------------------|------------------------------------------|
| 5.0      | 100                  | $0.119 \cdot x + 1.209$                    | 0.998                               | $0.081 \cdot x + 0.799$                         | 1.000                                    |
|          | 350                  | $0.071 \cdot x + 1.265$                    | 0.975                               | $0.080 \cdot x + 0.779$                         | 1.000                                    |
|          | 600                  | $0.033 \cdot x + 1.297$                    | 0.914                               | $0.072 \cdot x + 0.779$                         | 0.987                                    |
|          | 800                  | $0.027 \cdot x + 1.286$                    | 0.985                               | $0.060 \cdot x + 0.776$                         | 0.987                                    |
| 4.5      | 100                  | $0.119 \cdot x + 1.222$                    | 0.999                               | $0.088 \cdot x + 0.904$                         | 0.967                                    |
|          | 350                  | $0.104 \cdot x + 1.216$                    | 0.999                               | $0.076 \cdot x + 0.896$                         | 0.969                                    |
|          | 600                  | $0.083 \cdot x + 1.256$                    | 1.000                               | $0.076 \cdot x + 0.868$                         | 0.901                                    |
|          | 800                  | $0.061 \cdot x + 1.303$                    | 0.990                               | $0.064 \cdot x + 0.880$                         | 0.874                                    |
| 4.0      | 100                  | $0.146 \cdot x + 1.316$                    | 0.975                               | $0.120 \cdot x + 0.901$                         | 1.000                                    |
|          | 350                  | $0.126 \cdot x + 1.318$                    | 0.987                               | $0.128 \cdot x + 0.860$                         | 0.996                                    |
|          | 600                  | $0.118 \cdot x + 1.294$                    | 0.976                               | $0.112 \cdot x + 0.868$                         | 0.942                                    |
|          | 800                  | $0.111 \cdot x + 1.269$                    | 0.985                               | $0.076 \cdot x + 0.908$                         | 0.901                                    |
| 3.5      | 100                  | $0.225 \cdot x + 1.296$                    | 0.989                               | $0.124 \cdot x + 1.001$                         | 0.989                                    |
|          | 350                  | $0.167 \cdot x + 1.369$                    | 0.982                               | $0.132 \cdot x + 1.001$                         | 0.983                                    |
|          | 600                  | $0.090 \cdot x + 1.501$                    | 0.939                               | $0.116 \cdot x + 0.977$                         | 0.987                                    |
|          | 800                  | $0.081 \cdot x + 1.527$                    | 0.918                               | $0.108 \cdot x + 0.949$                         | 0.975                                    |
| 3.0      | 100                  | $0.239 \cdot x + 1.415$                    | 0.985                               | $0.152 \cdot x + 1.053$                         | 0.997                                    |
|          | 350                  | $0.205 \cdot x + 1.440$                    | 0.976                               | $0.140 \cdot x + 1.081$                         | 0.972                                    |
|          | 600                  | $0.143 \cdot x + 1.545$                    | 0.965                               | $0.144 \cdot x + 1.041$                         | 0.973                                    |
|          | 800                  | $0.099 \cdot x + 1.624$                    | 0.975                               | $0.120 \cdot x + 1.073$                         | 0.987                                    |
| 2.5      | 100                  | $0.227 \cdot x + 1.693$                    | 0.969                               | $0.228 \cdot x + 1.049$                         | 0.994                                    |
|          | 350                  | $0.183 \cdot x + 1.731$                    | 0.944                               | $0.188 \cdot x + 1.129$                         | 0.991                                    |
|          | 600                  | $0.194 \cdot x + 1.670$                    | 0.958                               | $0.184 \cdot x + 1.121$                         | 0.983                                    |
|          | 800                  | $0.176 \cdot x + 1.685$                    | 0.959                               | $0.150 \cdot x + 1.191$                         | 0.977                                    |
| 2.0      | 100                  | $0.246 \cdot x + 1.925$                    | 0.982                               | $0.276 \cdot x + 1.113$                         | 0.994                                    |
|          | 350                  | $0.221 \cdot x + 1.929$                    | 0.975                               | $0.248 \cdot x + 1.276$                         | 0.988                                    |
|          | 600                  | $0.265 \cdot x + 1.839$                    | 0.979                               | $0.244 \cdot x + 1.249$                         | 0.982                                    |
|          | 800                  | $0.216 \cdot x + 1.900$                    | 0.968                               | $0.218 \cdot x + 1.235$                         | 0.974                                    |
| 1.5      | 100                  | $0.370 \cdot x + 2.010$                    | 0.970                               | $0.293 \cdot x + 1.372$                         | 0.989                                    |
|          | 350                  | $0.318 \cdot x + 2.113$                    | 0.953                               | $0.309 \cdot x + 1.424$                         | 0.985                                    |
|          | 600                  | $0.350 \cdot x + 2.043$                    | 0.975                               | $0.249 \cdot x + 1.568$                         | 0.974                                    |
|          | 800                  | $0.293 \cdot x + 2.165$                    | 0.966                               | $0.249 \cdot x + 1.532$                         | 0.993                                    |
| 1.0      | 100                  | $0.421 \cdot x + 2.628$                    | 0.966                               | $0.492 \cdot x + 1.381$                         | 0.999                                    |
|          | 350                  | $0.333 \cdot x + 2.865$                    | 0.986                               | $0.456 \cdot x + 1.618$                         | 0.997                                    |
|          | 600                  | $0.429 \cdot x + 2.565$                    | 0.987                               | $0.380 \cdot x + 1.838$                         | 0.991                                    |
|          | 800                  | $0.391 \cdot x + 2.762$                    | 0.994                               | $0.384 \cdot x + 1.778$                         | 0.988                                    |
| 0.5      | 100                  | $1.002 \cdot x + 2.789$                    | 0.911                               | $0.633 \cdot x + 1.705$                         | 0.995                                    |
|          | 350                  | $0.930 \cdot x + 3.055$                    | 0.951                               | $0.709 \cdot x + 2.021$                         | 0.989                                    |
|          | 600                  | $0.906 \cdot x + 3.271$                    | 0.912                               | $0.725 \cdot x + 2.181$                         | 0.984                                    |
|          | 800                  | $0.827 \cdot x + 3.549$                    | 0.902                               | $0.685 \cdot x + 2.301$                         | 0.975                                    |

|      |     |                         |       |                         |       |
|------|-----|-------------------------|-------|-------------------------|-------|
| 0.1  | 100 | $2.698 \cdot x + 2.020$ | 1.000 | $1.021 \cdot x + 1.717$ | 0.999 |
|      | 350 | $2.731 \cdot x + 3.276$ | 0.997 | $1.465 \cdot x + 1.950$ | 1.000 |
|      | 600 | $2.673 \cdot x + 4.187$ | 0.991 | $1.565 \cdot x + 2.691$ | 0.999 |
|      | 800 | $2.583 \cdot x + 5.715$ | 0.969 | $1.601 \cdot x + 2.827$ | 0.999 |
| 0.05 | 100 | $3.41 \cdot x + 1.707$  | 1.000 | $1.117 \cdot x + 1.838$ | 0.993 |
|      | 350 | $3.891 \cdot x + 2.764$ | 0.997 | $1.690 \cdot x + 2.021$ | 0.999 |
|      | 600 | $3.983 \cdot x + 3.644$ | 0.987 | $1.982 \cdot x + 2.518$ | 0.999 |
|      | 800 | $4.510 \cdot x + 4.792$ | 0.978 | $2.026 \cdot x + 2.418$ | 0.998 |

### S.9. Modifications in modeled grounding zones resulting from input parameters changes

Differences in grounding zone widths for the thickest and thinnest modeled glaciers for every inflow speed and every bedrock slope for both models are provided in Table S6.

**Table S6.** Grounding zone width difference (in meters) for a 2500 m-thick glacier and a 1000 m-thick glacier.

| $\Delta GZ = GZ_{H=2.5km} - GZ_{H=1.0km}, m$ (viscous model)      |              |     |     |     |     |     |     |     |     |      |      |      |
|-------------------------------------------------------------------|--------------|-----|-----|-----|-----|-----|-----|-----|-----|------|------|------|
| Speed,<br>m/year                                                  | Bed slope, % |     |     |     |     |     |     |     |     |      |      |      |
|                                                                   | 5.0          | 4.5 | 4.0 | 3.5 | 3.0 | 2.5 | 2.0 | 1.5 | 1.0 | 0.5  | 0.1  | 0.05 |
| 100                                                               | 175          | 175 | 200 | 360 | 390 | 375 | 385 | 635 | 740 | 1866 | 4091 | 5066 |
| 350                                                               | 120          | 160 | 170 | 265 | 350 | 320 | 370 | 550 | 545 | 1651 | 4266 | 6127 |
| 600                                                               | 60           | 125 | 155 | 145 | 240 | 315 | 430 | 575 | 715 | 1696 | 4281 | 6627 |
| 800                                                               | 35           | 85  | 150 | 145 | 135 | 270 | 370 | 510 | 615 | 1565 | 4412 | 6701 |
| Mean                                                              | 98           | 136 | 169 | 229 | 279 | 320 | 389 | 568 | 654 | 1695 | 4263 | 6130 |
| $\Delta GZ = GZ_{H=2.5km} - GZ_{H=1.0km}, m$ (viscoelastic model) |              |     |     |     |     |     |     |     |     |      |      |      |
| Speed,<br>m/year                                                  | Bed slope, % |     |     |     |     |     |     |     |     |      |      |      |
|                                                                   | 5.0          | 4.5 | 4.0 | 3.5 | 3.0 | 2.5 | 2.0 | 1.5 | 1.0 | 0.5  | 0.1  | 0.05 |
| 100                                                               | 121          | 141 | 180 | 200 | 240 | 360 | 440 | 481 | 761 | 961  | 1502 | 1521 |
| 350                                                               | 120          | 121 | 201 | 220 | 240 | 300 | 400 | 501 | 720 | 1141 | 2222 | 2543 |
| 600                                                               | 100          | 141 | 201 | 180 | 240 | 300 | 400 | 421 | 600 | 1202 | 2362 | 2963 |
| 800                                                               | 80           | 121 | 141 | 180 | 200 | 260 | 370 | 401 | 620 | 1142 | 2482 | 3143 |
| Mean                                                              | 105          | 131 | 181 | 195 | 230 | 305 | 403 | 451 | 675 | 1112 | 2142 | 2543 |

## S.10. Modeled grounding zones

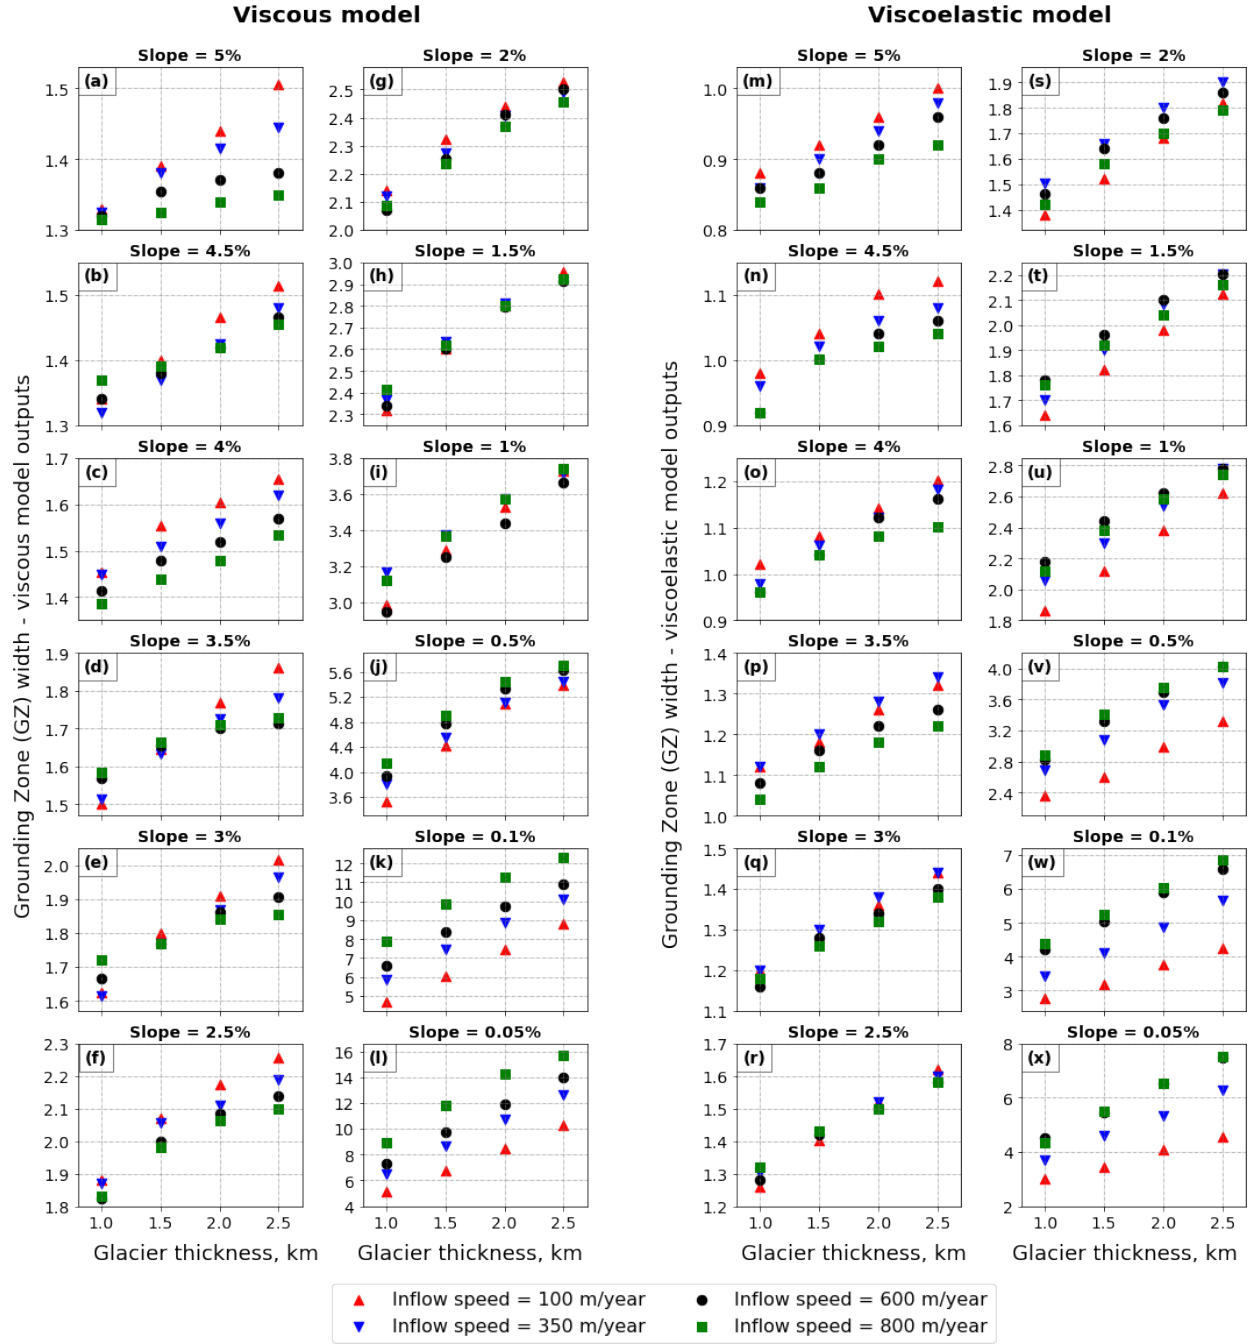

**Figure S4.** Dependence of the grounding zone width from the glacier thickness for all considered inflow speeds and bed slopes for both viscous and viscoelastic models. Subplots (a) – (l) correspond to the viscous model; subplots (m) – (x) correspond to the viscoelastic model. Corresponding bed slope is written above each subplot, the x-axis of each subplot shows the glacier thickness in meters, while the y-axis shows the evolution of the grounding zone as the glacier becomes thicker. Each subplot contains four sets of values, colored based on the inflow speed used as a model input at a corresponding model run.

### S.11. Performance of the models

The models' accuracy is calculated as the percentage of DInSAR measurements that fall inside the model domain and is summarized in Table S7. **Error! Reference source not found.**

**Table S7.** Analysis of the performance of the models. The percentages shown in the table indicate the percentage of the measurements for each glacier that fall within the domain of the corresponding model.

|                                | <b>TOT</b>     |                     | <b>REN</b>     |                     | <b>MU</b>      |                     |
|--------------------------------|----------------|---------------------|----------------|---------------------|----------------|---------------------|
| Number of profiles             | 17             |                     | 19             |                     | 33             |                     |
| <b>Model</b>                   | <b>Viscous</b> | <b>Viscoelastic</b> | <b>Viscous</b> | <b>Viscoelastic</b> | <b>Viscous</b> | <b>Viscoelastic</b> |
| All profiles (no error bars)   | 29%            | 88%                 | 0%             | 90%                 | 9%             | 82%                 |
| All profiles (with error bars) | 65%            | 88%                 | 47%            | 100%                | 82%            | 100%                |
